# Supplementary material
Source: publisher site journal article supplement (https://www.dovepress.com/article/104985)
Supplement: Supplementary file 1 [file get_supplementary_file.php]

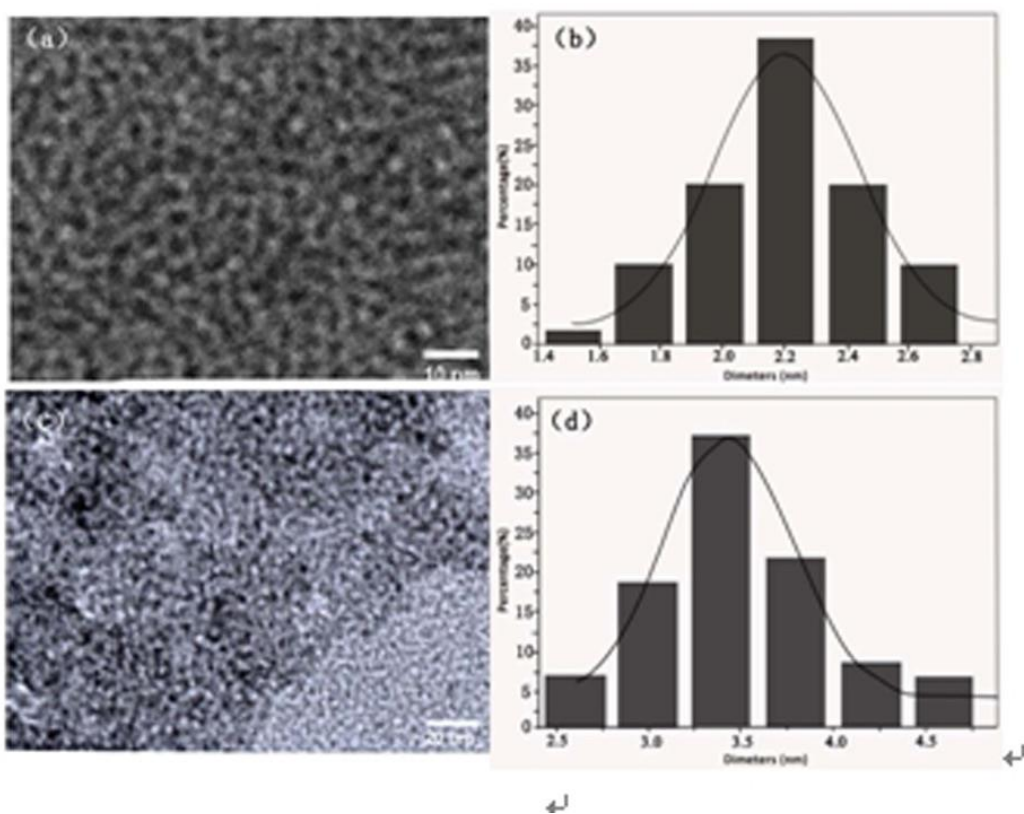

**Figure S1** TEM images of MPA-modified CdTe QDs and its corresponding size distribution for 2.2 nm (a,b) and 3.5 nm (c,d).

**Abbreviations:** TEM, transmission electron microscopy; MPA, 3-mercaptopropionic acid; QDs, quantum dots.

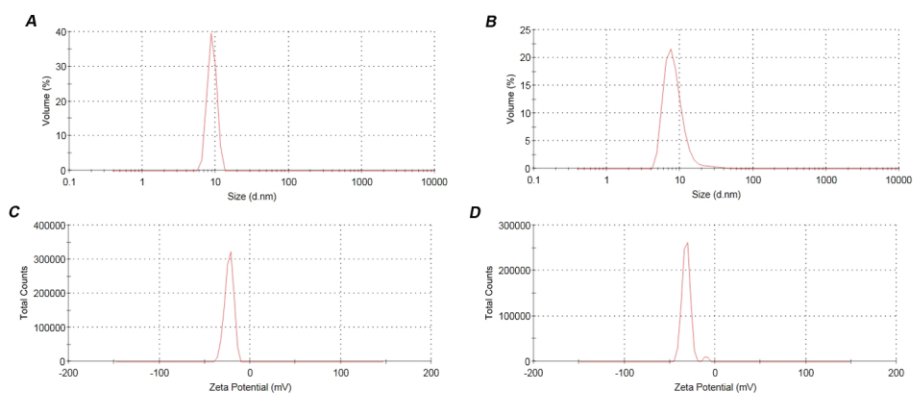

Figure S2 Dynamic light scattering (A and B) and  $\zeta$ -potential measurements (C and D) of 3.5 nm and 2.2 nm MPA-modified CdTe QDs. DLS values are the average of at least 10 runs each containing 15 submeasurements.  $\zeta$ -potential values are the average of at least 10 runs each containing 30 submeasurements.

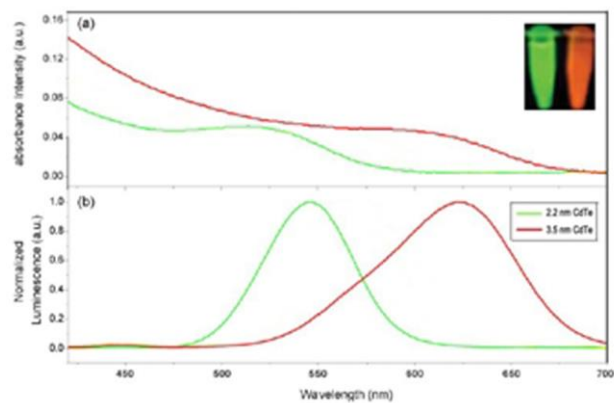

Figure S3 UV-vis absorption (a) and PL spectra (b) of MPA-modified CdTe QDs (2.2 nm and 3.5 nm). The inset shows the fluorescent photograph of as-synthesized CdTe QDs under UV irradiation.

1600  $\mu\text{g}/\text{mL}$   
2.2 nm CdTe QD

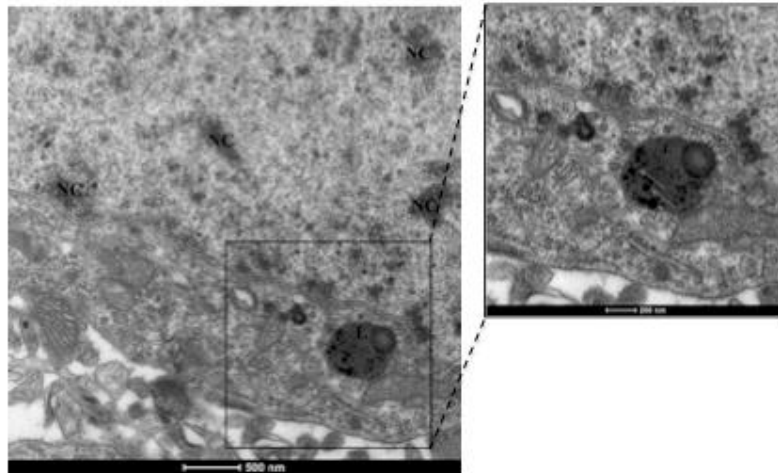

1600  $\mu\text{g}/\text{mL}$   
3.5 nm CdTe QD

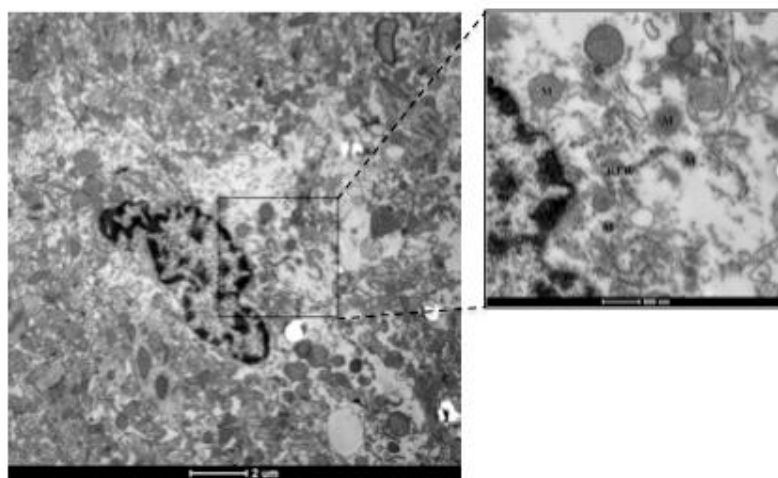

Figure S4. The uptake of MPA-modified CdTe QDs by the hippocampal neurons of treated rats. The arrow indicates accumulated QDs in the lysosome.

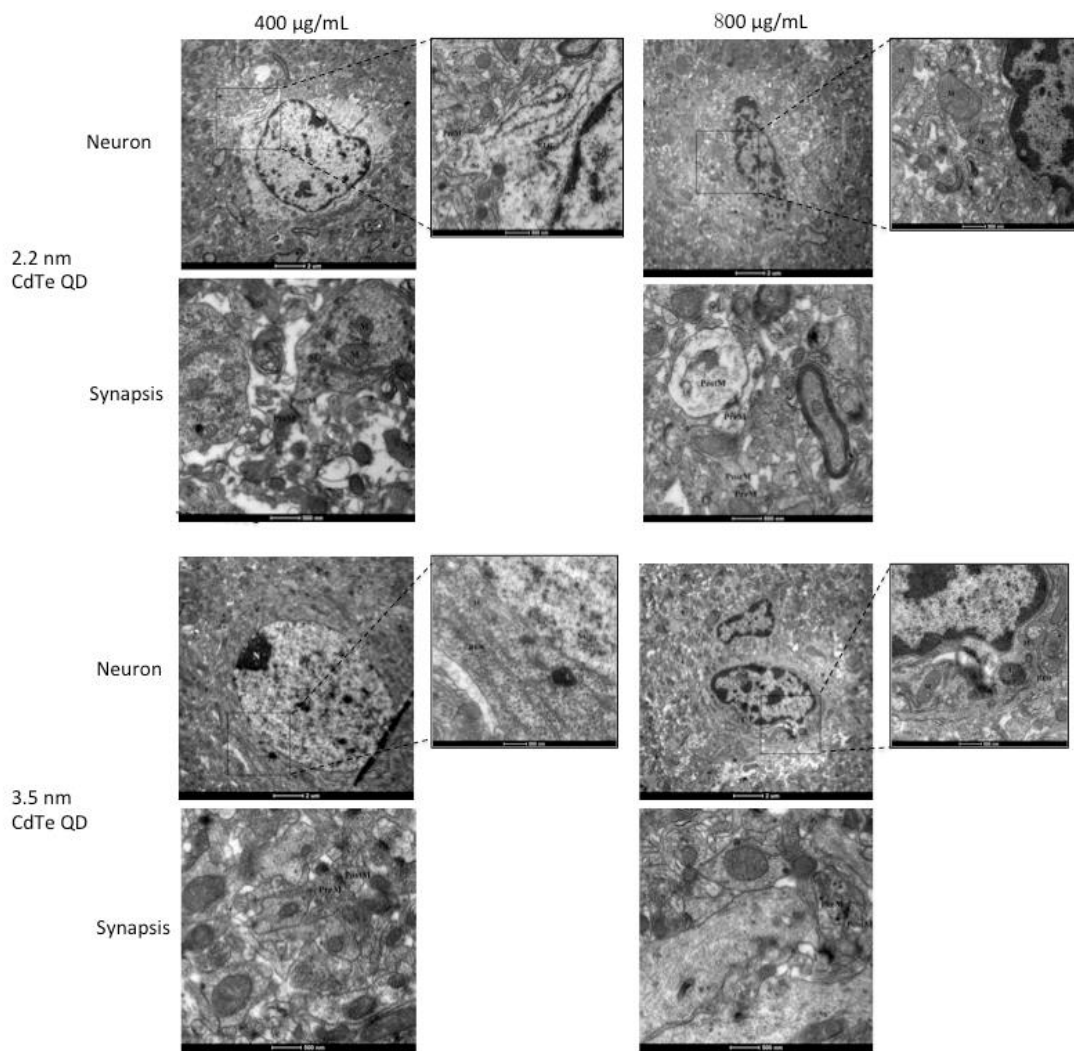

Figure S5. TEM images of hippocampus of rats treated with 400 µg/mL and 800 µg/mL 2.2 nm and 3.5 nm MPA-modified CdTe QDs.

Table S1. All GO terms of genes differentially expressed during 2.2 nm and 3.5 nm MPA-modified CdTe QD exposure on rat hippocampus.

| Category                          | Term                                         | No. of gene | Count(%) | Fold Enrichment | Bonferroni corrected Pvalue |
|-----------------------------------|----------------------------------------------|-------------|----------|-----------------|-----------------------------|
| <b>2.2 nm CdTe QD vs. Control</b> |                                              |             |          |                 |                             |
| Biological Process                | immune response                              | 10          | 25       | 10.07           | 7.78E-05                    |
| Biological Process                | response to virus                            | 5           | 12.5     | 45.32           | 1.19E-03                    |
| Cellular Component                | integrin complex                             | 3           | 7.5      | 80.82           | 1.64E-02                    |
| <b>3.5 nm CdTe QD vs. Control</b> |                                              |             |          |                 |                             |
| Biological Process                | immune response                              | 107         | 15.20    | 6.69            | 8.33E-56                    |
| Biological Process                | defense response                             | 83          | 11.79    | 5.39            | 3.10E-34                    |
| Biological Process                | response to organic substance                | 73          | 10.37    | 2.04            | 1.69E-05                    |
| Biological Process                | response to wounding                         | 71          | 10.09    | 4.34            | 1.44E-22                    |
| Biological Process                | regulation of cell proliferation             | 58          | 8.24     | 2.26            | 2.55E-05                    |
| Biological Process                | positive regulation of immune system process | 57          | 8.10     | 6.36            | 4.12E-26                    |
| Biological Process                | regulation of programmed cell death          | 55          | 7.81     | 2.08            | 1.07E-03                    |
| Biological Process                | regulation of cell death                     | 55          | 7.81     | 2.07            | 1.22E-03                    |
| Biological Process                | regulation of apoptosis                      | 54          | 7.67     | 2.07            | 1.65E-03                    |
| Biological Process                | inflammatory response                        | 51          | 7.24     | 6.09            | 5.10E-22                    |
| Biological Process                | positive regulation of response to stimulus  | 51          | 7.24     | 5.69            | 1.30E-20                    |
| Biological Process                | cell activation                              | 50          | 7.10     | 5.35            | 6.86E-19                    |
| Biological Process                | leukocyte activation                         | 43          | 6.11     | 5.23            | 2.18E-15                    |
| Biological Process                | positive regulation of molecular function    | 42          | 5.97     | 2.14            | 1.51E-02                    |

---

|                    |                                              |    |      |      |          |
|--------------------|----------------------------------------------|----|------|------|----------|
| Biological Process | positive regulation of immune response       | 40 | 5.68 | 7.35 | 9.80E-20 |
| Biological Process | positive regulation of cell proliferation    | 39 | 5.54 | 2.60 | 3.18E-04 |
| Biological Process | response to bacterium                        | 36 | 5.11 | 4.40 | 6.14E-10 |
| Biological Process | immune effector process                      | 35 | 4.97 | 7.49 | 3.80E-17 |
| Biological Process | regulation of cell activation                | 35 | 4.97 | 5.39 | 2.47E-12 |
| Biological Process | regulation of leukocyte activation           | 33 | 4.69 | 5.31 | 3.18E-11 |
| Biological Process | positive regulation of developmental process | 31 | 4.40 | 2.58 | 9.69E-03 |
| Biological Process | positive regulation of cell communication    | 30 | 4.26 | 2.43 | 4.63E-02 |
| Biological Process | innate immune response                       | 29 | 4.12 | 8.83 | 8.78E-16 |
| Biological Process | lymphocyte activation                        | 29 | 4.12 | 4.47 | 1.31E-07 |
| Biological Process | locomotory behavior                          | 29 | 4.12 | 3.61 | 2.00E-05 |
| Biological Process | hemopoietic or lymphoid organ development    | 29 | 4.12 | 3.00 | 1.07E-03 |
| Biological Process | immune system development                    | 29 | 4.12 | 2.87 | 2.78E-03 |
| Biological Process | positive regulation of signal transduction   | 28 | 3.98 | 2.54 | 4.10E-02 |
| Biological Process | taxis                                        | 27 | 3.84 | 8.42 | 6.94E-14 |
| Biological Process | chemotaxis                                   | 27 | 3.84 | 8.42 | 6.94E-14 |
| Biological Process | activation of immune response                | 27 | 3.84 | 7.77 | 6.18E-13 |
| Biological Process | positive regulation of cell activation       | 27 | 3.84 | 6.36 | 1.41E-10 |
| Biological Process | regulation of lymphocyte activation          | 27 | 3.84 | 4.85 | 1.03E-07 |
| Biological Process | hemopoiesis                                  | 27 | 3.84 | 3.09 | 1.66E-03 |
| Biological Process | response to molecule of bacterial origin     | 26 | 3.69 | 5.26 | 4.13E-08 |
| Biological Process | regulation of protein kinase cascade         | 26 | 3.69 | 2.76 | 2.22E-02 |

|                    |                                                                                                                           |    |      |      |          |
|--------------------|---------------------------------------------------------------------------------------------------------------------------|----|------|------|----------|
| Biological Process | positive regulation of multicellular organismal process                                                                   | 26 | 3.69 | 2.70 | 3.16E-02 |
| Biological Process | positive regulation of cell differentiation                                                                               | 26 | 3.69 | 2.67 | 3.87E-02 |
| Biological Process | leukocyte mediated immunity                                                                                               | 25 | 3.55 | 8.63 | 6.18E-13 |
| Biological Process | positive regulation of leukocyte activation                                                                               | 25 | 3.55 | 6.11 | 3.70E-09 |
| Biological Process | regulation of cytokine production                                                                                         | 25 | 3.55 | 4.18 | 1.50E-05 |
| Biological Process | regulation of response to external stimulus                                                                               | 25 | 3.55 | 4.02 | 3.23E-05 |
| Biological Process | regulation of immune effector process                                                                                     | 24 | 3.41 | 5.70 | 5.17E-08 |
| Biological Process | response to lipopolysaccharide                                                                                            | 24 | 3.41 | 5.31 | 2.38E-07 |
| Biological Process | adaptive immune response                                                                                                  | 23 | 3.27 | 9.02 | 4.94E-12 |
| Biological Process | adaptive immune response based on somatic recombination of immune receptors built from immunoglobulin superfamily domains | 23 | 3.27 | 9.02 | 4.94E-12 |
| Biological Process | regulation of T cell activation                                                                                           | 23 | 3.27 | 5.32 | 6.25E-07 |
| Biological Process | wound healing                                                                                                             | 23 | 3.27 | 3.42 | 2.50E-03 |
| Biological Process | antigen processing and presentation                                                                                       | 22 | 3.13 | 6.86 | 9.60E-09 |
| Biological Process | positive regulation of lymphocyte activation                                                                              | 22 | 3.13 | 5.87 | 2.37E-07 |
| Biological Process | T cell activation                                                                                                         | 22 | 3.13 | 5.09 | 3.96E-06 |
| Biological Process | positive regulation of protein kinase cascade                                                                             | 21 | 2.98 | 3.20 | 2.35E-02 |
| Biological Process | lymphocyte mediated immunity                                                                                              | 20 | 2.84 | 8.49 | 1.74E-09 |
| Biological Process | aging                                                                                                                     | 20 | 2.84 | 3.45 | 1.34E-02 |
| Biological Process | myeloid leukocyte activation                                                                                              | 19 | 2.70 | 9.28 | 1.31E-09 |



---

|                    |                                                        |    |      |       |          |
|--------------------|--------------------------------------------------------|----|------|-------|----------|
| Biological Process | acute inflammatory response                            | 19 | 2.70 | 5.47  | 2.05E-05 |
| Biological Process | immune response-activating signal transduction         | 18 | 2.56 | 8.47  | 3.35E-08 |
| Biological Process | leukocyte migration                                    | 18 | 2.56 | 8.18  | 6.39E-08 |
| Biological Process | immune response-regulating signal transduction         | 18 | 2.56 | 7.77  | 1.59E-07 |
| Biological Process | antigen processing and presentation of peptide antigen | 17 | 2.41 | 11.29 | 8.51E-10 |
| Biological Process | positive regulation of defense response                | 17 | 2.41 | 6.57  | 9.35E-06 |
| Biological Process | positive regulation of T cell activation               | 17 | 2.41 | 6.03  | 3.54E-05 |
| Biological Process | regulation of leukocyte mediated immunity              | 17 | 2.41 | 5.95  | 4.36E-05 |
| Biological Process | positive regulation of cytokine production             | 17 | 2.41 | 5.87  | 5.35E-05 |
| Biological Process | cell chemotaxis                                        | 16 | 2.27 | 10.36 | 2.27E-08 |
| Biological Process | regulation of lymphocyte proliferation                 | 16 | 2.27 | 4.71  | 3.25E-03 |
| Biological Process | regulation of mononuclear cell proliferation           | 16 | 2.27 | 4.65  | 3.77E-03 |
| Biological Process | regulation of leukocyte proliferation                  | 16 | 2.27 | 4.55  | 5.04E-03 |
| Biological Process | leukocyte chemotaxis                                   | 15 | 2.13 | 10.50 | 9.89E-08 |
| Biological Process | cell activation during immune response                 | 15 | 2.13 | 9.03  | 1.03E-06 |
| Biological Process | leukocyte activation during immune response            | 15 | 2.13 | 9.03  | 1.03E-06 |
| Biological Process | immunoglobulin mediated immune response                | 15 | 2.13 | 8.09  | 5.29E-06 |
| Biological Process | cytokine production                                    | 15 | 2.13 | 7.93  | 7.15E-06 |
| Biological Process | B cell mediated immunity                               | 15 | 2.13 | 7.77  | 9.58E-06 |
| Biological Process | regulation of innate immune response                   | 15 | 2.13 | 7.62  | 1.27E-05 |
| Biological Process | negative regulation of immune system process           | 15 | 2.13 | 4.62  | 9.70E-03 |

---

|                    |                                                                                                                                         |    |      |       |          |
|--------------------|-----------------------------------------------------------------------------------------------------------------------------------------|----|------|-------|----------|
| Biological Process | defense response to bacterium                                                                                                           | 15 | 2.13 | 4.18  | 3.26E-02 |
| Biological Process | response to virus                                                                                                                       | 14 | 1.99 | 7.88  | 3.10E-05 |
| Biological Process | regulation of adaptive immune response                                                                                                  | 14 | 1.99 | 5.75  | 1.75E-03 |
| Biological Process | regulation of adaptive immune response based on somatic recombination of immune receptors built from immunoglobulin superfamily domains | 14 | 1.99 | 5.75  | 1.75E-03 |
| Biological Process | immune response-activating cell surface receptor signaling pathway                                                                      | 13 | 1.85 | 8.01  | 1.00E-04 |
| Biological Process | immune response-regulating cell surface receptor signaling pathway                                                                      | 13 | 1.85 | 7.32  | 3.06E-04 |
| Biological Process | positive regulation of immune effector process                                                                                          | 13 | 1.85 | 6.60  | 1.05E-03 |
| Biological Process | regulation of lymphocyte mediated immunity                                                                                              | 13 | 1.85 | 5.18  | 1.61E-02 |
| Biological Process | regulation of lymphocyte differentiation                                                                                                | 12 | 1.70 | 5.45  | 2.52E-02 |
| Biological Process | positive regulation of lymphocyte proliferation                                                                                         | 12 | 1.70 | 5.27  | 3.54E-02 |
| Biological Process | positive regulation of mononuclear cell proliferation                                                                                   | 12 | 1.70 | 5.18  | 4.18E-02 |
| Biological Process | antigen processing and presentation of exogenous peptide antigen                                                                        | 11 | 1.56 | 14.24 | 2.39E-06 |
| Biological Process | antigen processing and presentation of exogenous antigen                                                                                | 11 | 1.56 | 11.39 | 3.55E-05 |
| Biological Process | positive regulation of lymphocyte differentiation                                                                                       | 11 | 1.56 | 7.91  | 1.88E-03 |
| Biological Process | leukocyte proliferation                                                                                                                 | 11 | 1.56 | 6.62  | 1.11E-02 |
| Biological Process | mononuclear cell proliferation                                                                                                          | 11 | 1.56 | 6.62  | 1.11E-02 |
| Biological Process | neutrophil chemotaxis                                                                                                                   | 10 | 1.42 | 11.26 | 2.44E-04 |

---

|                    |                                                                                                                                                  |     |       |       |          |
|--------------------|--------------------------------------------------------------------------------------------------------------------------------------------------|-----|-------|-------|----------|
| Biological Process | myeloid cell activation during immune response                                                                                                   | 10  | 1.42  | 9.96  | 8.40E-04 |
| Biological Process | positive regulation of T cell differentiation                                                                                                    | 10  | 1.42  | 7.62  | 1.07E-02 |
| Biological Process | antigen receptor-mediated signaling pathway                                                                                                      | 10  | 1.42  | 7.40  | 1.38E-02 |
| Biological Process | positive regulation of innate immune response                                                                                                    | 10  | 1.42  | 6.81  | 2.86E-02 |
| Biological Process | positive regulation of adaptive immune response                                                                                                  | 10  | 1.42  | 6.64  | 3.58E-02 |
| Biological Process | positive regulation of adaptive immune response based on somatic recombination of immune receptors built from immunoglobulin superfamily domains | 10  | 1.42  | 6.64  | 3.58E-02 |
| Biological Process | antigen processing and presentation of exogenous peptide antigen via MHC class II                                                                | 9   | 1.28  | 16.65 | 3.12E-05 |
| Biological Process | antigen processing and presentation of peptide antigen via MHC class II                                                                          | 9   | 1.28  | 16.65 | 3.12E-05 |
| Biological Process | antigen processing and presentation of peptide or polysaccharide antigen via MHC class II                                                        | 9   | 1.28  | 14.56 | 1.25E-04 |
| Biological Process | T cell proliferation                                                                                                                             | 9   | 1.28  | 7.77  | 3.46E-02 |
| Biological Process | regulation of acute inflammatory response                                                                                                        | 9   | 1.28  | 7.52  | 4.49E-02 |
| Biological Process | leukocyte adhesion                                                                                                                               | 8   | 1.14  | 9.01  | 4.69E-02 |
| Biological Process | B cell receptor signaling pathway                                                                                                                | 7   | 0.99  | 13.94 | 1.19E-02 |
| Biological Process | positive regulation of tumor necrosis factor production                                                                                          | 7   | 0.99  | 13.94 | 1.19E-02 |
| Cellular Component | plasma membrane                                                                                                                                  | 160 | 22.73 | 1.71  | 3.40E-11 |
| Cellular Component | extracellular region                                                                                                                             | 99  | 14.06 | 1.98  | 5.15E-09 |
| Cellular Component | plasma membrane part                                                                                                                             | 91  | 12.93 | 1.72  | 5.57E-05 |

---

|                    |                                            |    |      |       |          |
|--------------------|--------------------------------------------|----|------|-------|----------|
| Cellular Component | extracellular region part                  | 63 | 8.95 | 2.33  | 1.43E-07 |
| Cellular Component | extracellular space                        | 48 | 6.82 | 2.50  | 3.06E-06 |
| Cellular Component | cell surface                               | 39 | 5.54 | 2.94  | 1.20E-06 |
| Cellular Component | external side of plasma membrane           | 27 | 3.84 | 4.14  | 4.27E-07 |
| Cellular Component | vacuole                                    | 26 | 3.69 | 3.38  | 5.82E-05 |
| Cellular Component | lysosome                                   | 25 | 3.55 | 3.95  | 5.10E-06 |
| Cellular Component | lytic vacuole                              | 25 | 3.55 | 3.95  | 5.10E-06 |
| Cellular Component | receptor complex                           | 15 | 2.13 | 3.66  | 1.74E-02 |
| Cellular Component | vesicle lumen                              | 11 | 1.56 | 5.87  | 4.08E-03 |
| Cellular Component | platelet alpha granule                     | 11 | 1.56 | 5.31  | 1.02E-02 |
| Cellular Component | MHC protein complex                        | 11 | 1.56 | 5.21  | 1.21E-02 |
| Cellular Component | platelet alpha granule lumen               | 10 | 1.42 | 6.40  | 5.76E-03 |
| Cellular Component | cytoplasmic membrane-bounded vesicle lumen | 10 | 1.42 | 5.95  | 1.07E-02 |
| Cellular Component | T cell receptor complex                    | 6  | 0.85 | 13.96 | 1.08E-02 |
| Cellular Component | alpha-beta T cell receptor complex         | 5  | 0.71 | 21.33 | 1.04E-02 |
| Molecular Function | protein dimerization activity              | 42 | 5.97 | 2.11  | 5.13E-03 |
| Molecular Function | carbohydrate binding                       | 34 | 4.83 | 2.68  | 3.00E-04 |
| Molecular Function | cytokine binding                           | 21 | 2.98 | 6.42  | 3.19E-08 |
| Molecular Function | cytokine activity                          | 19 | 2.70 | 4.59  | 8.69E-05 |
| Molecular Function | polysaccharide binding                     | 17 | 2.41 | 3.90  | 4.42E-03 |
| Molecular Function | pattern binding                            | 17 | 2.41 | 3.90  | 4.42E-03 |
| Molecular Function | glycosaminoglycan binding                  | 16 | 2.27 | 4.17  | 3.86E-03 |

---

|                       |                            |    |      |       |          |
|-----------------------|----------------------------|----|------|-------|----------|
| Molecular<br>Function | chemokine activity         | 14 | 1.99 | 11.63 | 3.04E-08 |
| Molecular<br>Function | chemokine receptor binding | 14 | 1.99 | 11.28 | 4.84E-08 |
| Molecular<br>Function | heparin binding            | 13 | 1.85 | 4.80  | 9.05E-03 |

---

Table S2. The rest of differentially expressed pathways in the control with 3.5 nm MPA-modified CdTe QD-treatment.

| <b>Term</b>                               | <b>Pathway ID</b> | <b>Input number of gene</b> | <b>Background number of gene</b> | <b>Corrected P-Value</b> |
|-------------------------------------------|-------------------|-----------------------------|----------------------------------|--------------------------|
| Chemokine signaling pathway               | rno04062          | 31                          | 155                              | 0.000224868              |
| Legionellosis                             | rno05134          | 16                          | 50                               | 0.000245244              |
| Hematopoietic cell lineage                | rno04640          | 20                          | 76                               | 0.000245244              |
| Phagosome                                 | rno04145          | 31                          | 158                              | 0.000245244              |
| Herpes simplex infection                  | rno05168          | 33                          | 176                              | 0.00027901               |
| Viral myocarditis                         | rno05416          | 19                          | 72                               | 0.000307548              |
| Rheumatoid arthritis                      | rno05323          | 20                          | 79                               | 0.000307548              |
| NOD-like receptor signaling pathway       | rno04621          | 16                          | 54                               | 0.0003588                |
| Primary immunodeficiency                  | rno05340          | 13                          | 36                               | 0.0003588                |
| Graft-versus-host disease                 | rno05332          | 15                          | 48                               | 0.0003588                |
| Complement and coagulation cascades       | rno04610          | 17                          | 62                               | 0.000426855              |
| NF-kappa B signaling pathway              | rno04064          | 20                          | 83                               | 0.000432465              |
| Influenza A                               | rno05164          | 28                          | 151                              | 0.000885282              |
| Type I diabetes mellitus                  | rno04940          | 15                          | 57                               | 0.001523512              |
| Allograft rejection                       | rno05330          | 14                          | 52                               | 0.001953369              |
| Natural killer cell mediated cytotoxicity | rno04650          | 18                          | 81                               | 0.002039337              |
| HTLV-I infection                          | rno05166          | 38                          | 250                              | 0.002039337              |
| Autoimmune thyroid disease                | rno05320          | 14                          | 56                               | 0.00331383               |
| TNF signaling pathway                     | rno04668          | 19                          | 98                               | 0.005508827              |
| Cytosolic DNA-sensing pathway             | rno04623          | 12                          | 46                               | 0.00566281               |
| Malaria                                   | rno05144          | 12                          | 47                               | 0.006431329              |
| Salmonella infection                      | rno05132          | 15                          | 72                               | 0.009330565              |
| Fc gamma R-mediated phagocytosis          | rno04666          | 15                          | 76                               | 0.014354617              |
| Inflammatory bowel disease (IBD)          | rno05321          | 12                          | 54                               | 0.016114137              |
| Leukocyte transendothelial migration      | rno04670          | 18                          | 103                              | 0.017024126              |
| Measles                                   | rno05162          | 19                          | 116                              | 0.024163724              |
| T cell receptor signaling pathway         | rno04660          | 17                          | 99                               | 0.024288879              |
| B cell receptor signaling pathway         | rno04662          | 13                          | 67                               | 0.026966697              |
| Epstein-Barr virus infection              | rno05169          | 26                          | 191                              | 0.044440886              |

---

---

|                                              |          |   |    |             |
|----------------------------------------------|----------|---|----|-------------|
| Intestinal immune network for IgA production | rno04672 | 9 | 41 | 0.048359461 |
|----------------------------------------------|----------|---|----|-------------|

---
